# Supplementary material
Source: PubMed Central journal article supplement (PMC6039346)

# Suppl Fig 1

**A**

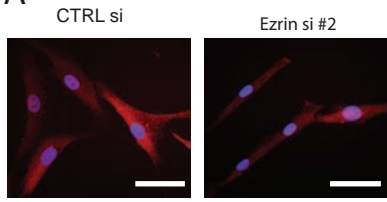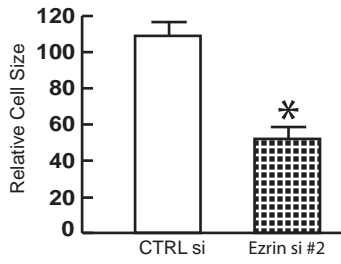

**B**

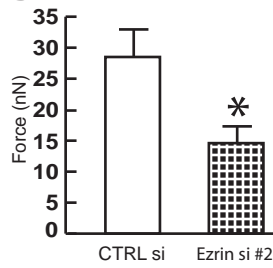

**C**

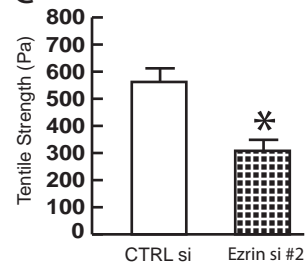

**D**

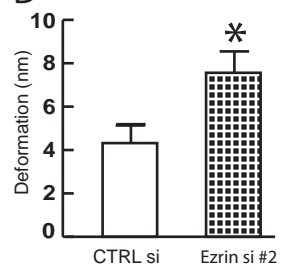

**E**

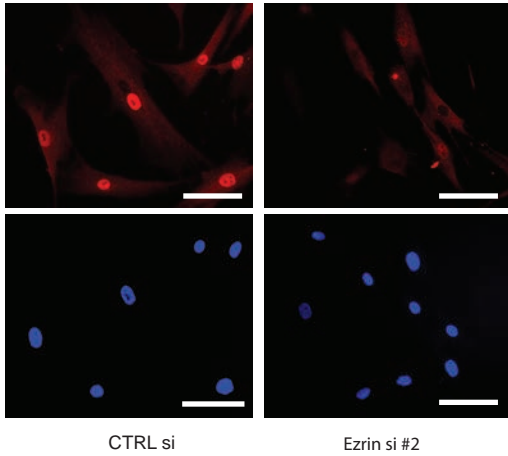

**F**

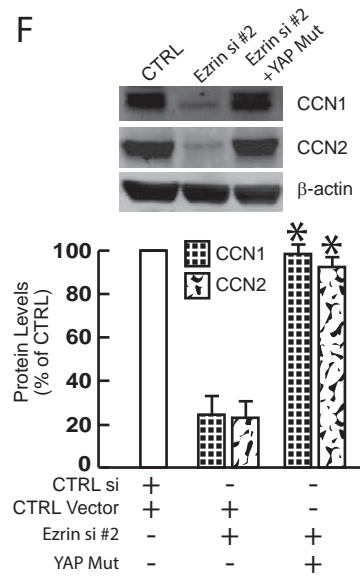

**G**

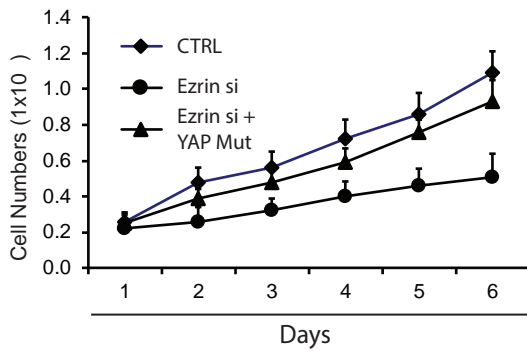

Supplement: 12079_2017_406_MOESM1_ESM.pdf [file 12079_2017_406_MOESM1_ESM.pdf]
